# Supplementary material
Source: PubMed Central journal article supplement (PMC5777195)
Supplement: 2017_176065-Disclosures_and_Contributions.pdf [file 2017_176065-Disclosures_and_Contributions.pdf]

Haematologica  
HAEMATOL/2017/176065  
Version 3

Long-term safety of deferiprone treatment in children from the  
Mediterranean region with beta-thalassaemia major: the DEEP-3  
multi-centre observational safety study

Sebastian Botzenhardt, Mariagrazia Felisi, Donato Bonifazi, Giovanni  
Carlo Del Vecchio, Maria Caterina Putti, Antonis Kattamis, Adriana  
Ceci, Ian CK Wong, and Antje Neubert  
(Collaborative Groups: the DEEP Consortium)

Disclosures: AK reports receiving research funding from Novartis Pharmaceuticals and honoraria from Novartis Pharmaceuticals and ApoPharma. All other authors declare no conflicts of interest in the context of this study.

Contributions: Study conception and design: AN, IW, MP, AC, GV, AK. Acquisition of data: SB, MF, DB, MC, GV, AK. Analysis and interpretation of data: SB, AN, MF, AC, MP. Drafting of manuscript: SB, AN. Critical revision: AN, AC, IW, DB.
